# Supplementary figures and images for: Ultrasonic Processing Induced Activity and Structural Changes of Polyphenol Oxidase in Orange (Citrus sinensis Osbeck)
Source: MDPI journal article supplement (doi:10.3390/molecules24101922), 2019-05-18

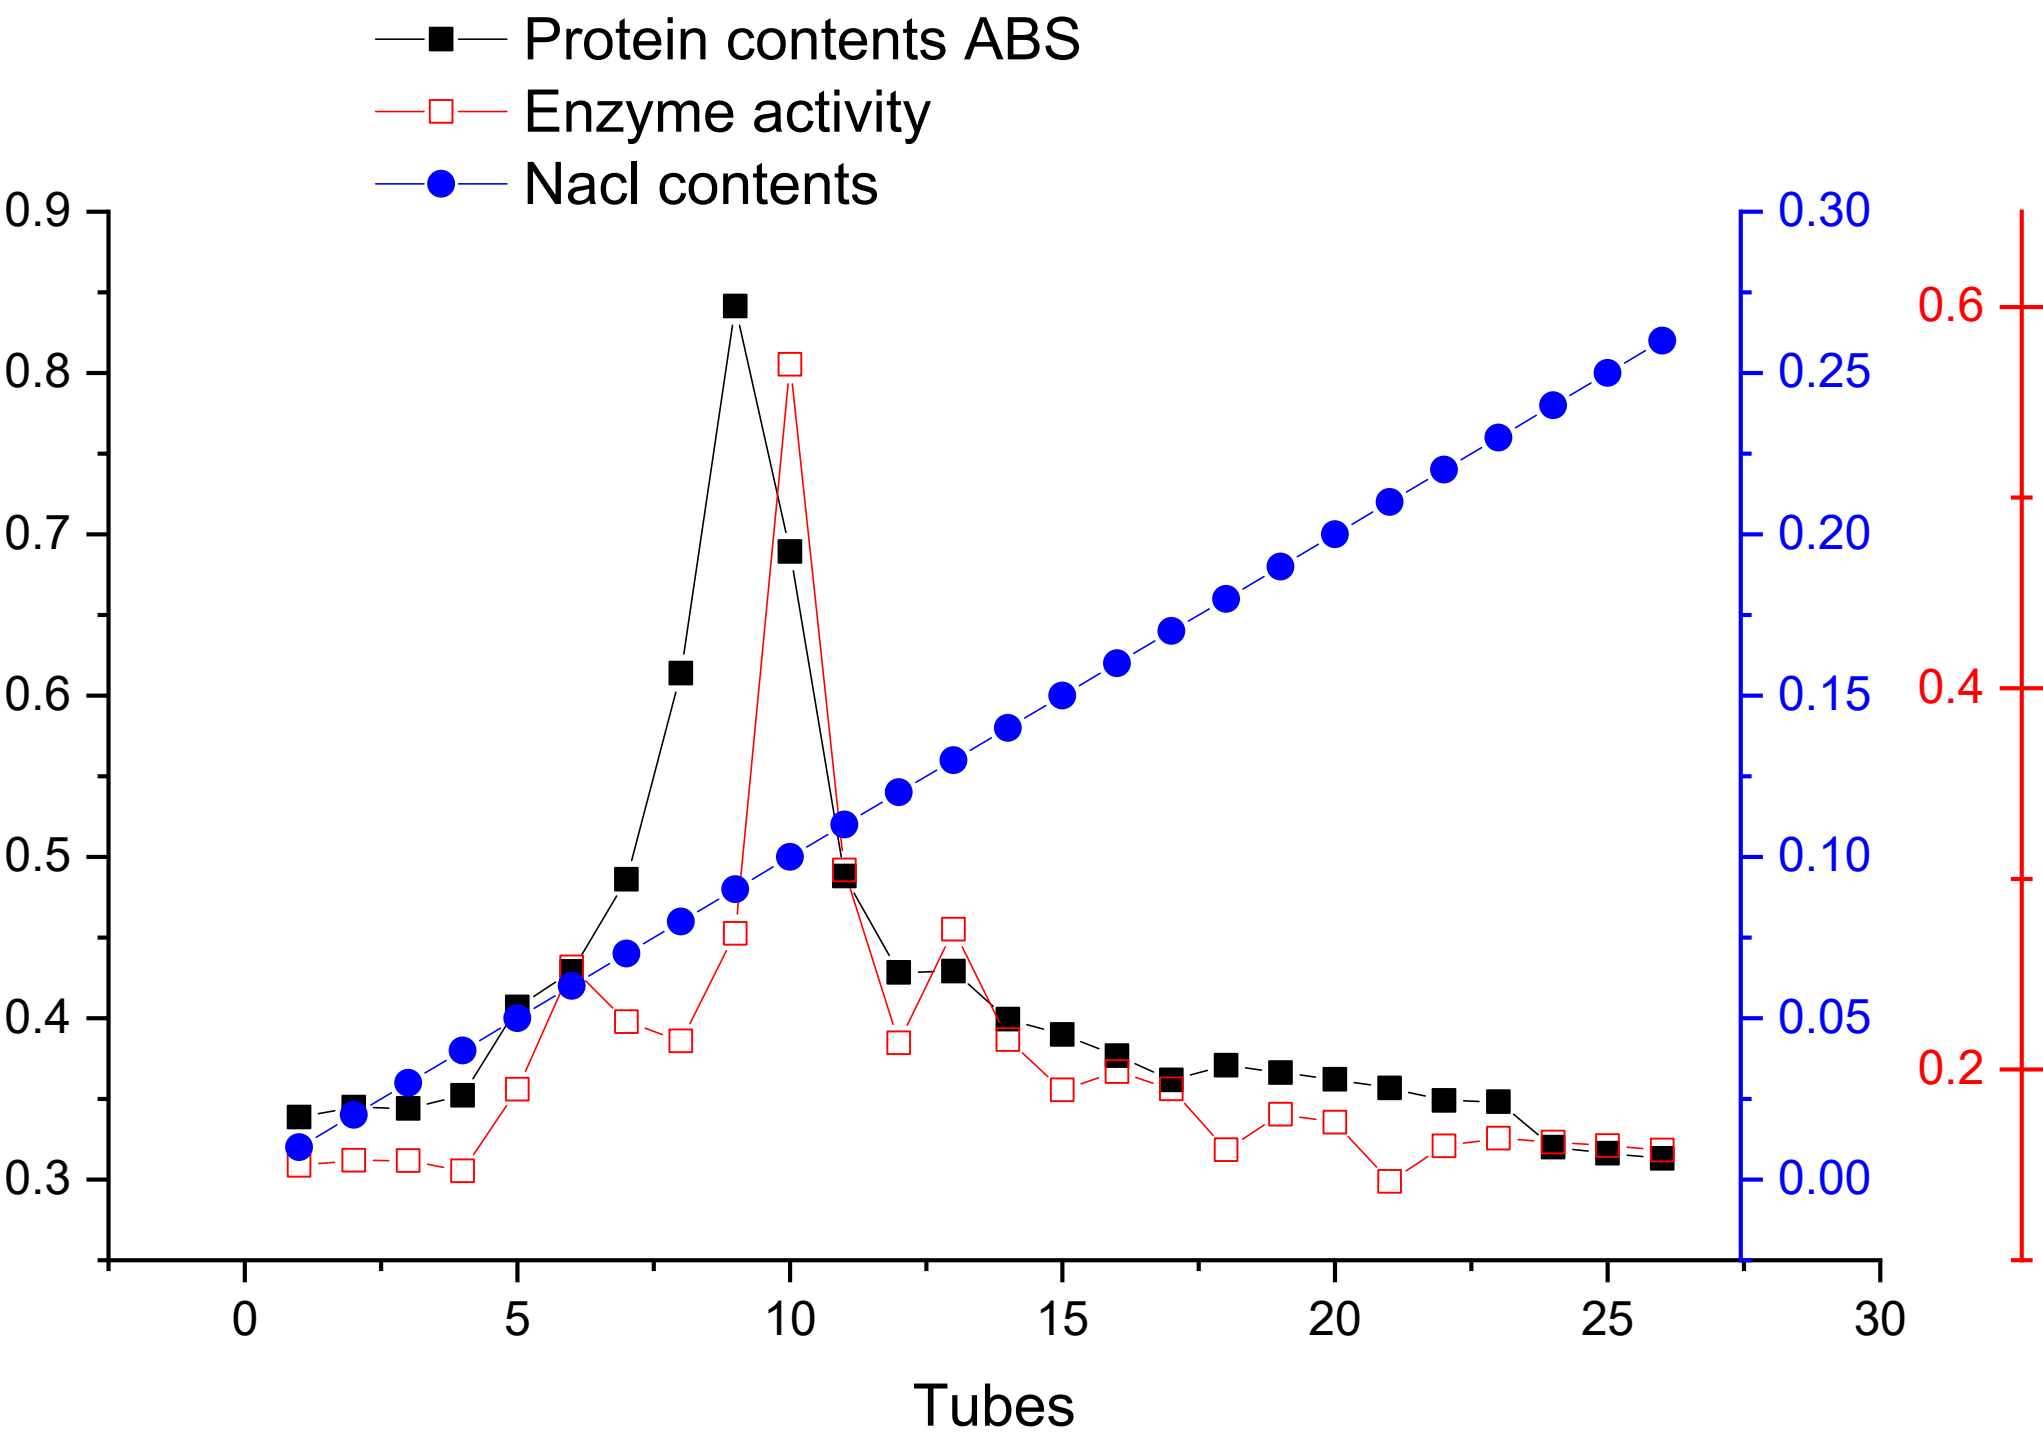

Supplement: s1 [file s1]
